# Supplementary material for: Electrospinning preparation of a H4SiW12O40/polycaprolactam composite nanofibrous membrane and its greatly enhanced photocatalytic activity and mechanism
Source: Royal Society of Chemistry journal article supplement (doi:10.1039/c5ra25550c), 2016-01-01
Supplement: c5ra25550c1.pdf [file c5ra25550c1.pdf]

## Electrospinning preparation of H<sub>4</sub>SiW<sub>12</sub>O<sub>40</sub>/Polycaprolactam composite nanofibrous membrane and its greatly enhanced photocatalytic activity and mechanism

Wei Li<sup>a</sup>, Tingting Li<sup>a\*</sup>, Xuegang Ma<sup>b</sup>, Yuanliang Li<sup>b</sup>, Libao An<sup>c</sup>, Zhiming Zhang<sup>a\*</sup>

<sup>a</sup> College of Material Science and Engineering, North China University of Science and Technology, Hebei Provincial Key Laboratory of Inorganic Nonmetallic Materials, Tangshan 063009, China

<sup>b</sup> Analysis and Testing Center, North China University of Science and Technology, Tangshan, China, 063009.

<sup>c</sup> College of Mechanical Engineering, North China University of Science and Technology, Tangshan 063009, China

\*Correspondence to: Zhiming Zhang (E-mail: [zhangzhiming1942@163.com](mailto:zhangzhiming1942@163.com)), Tingting Li (E-mail: [litingting2046@163.com](mailto:litingting2046@163.com))

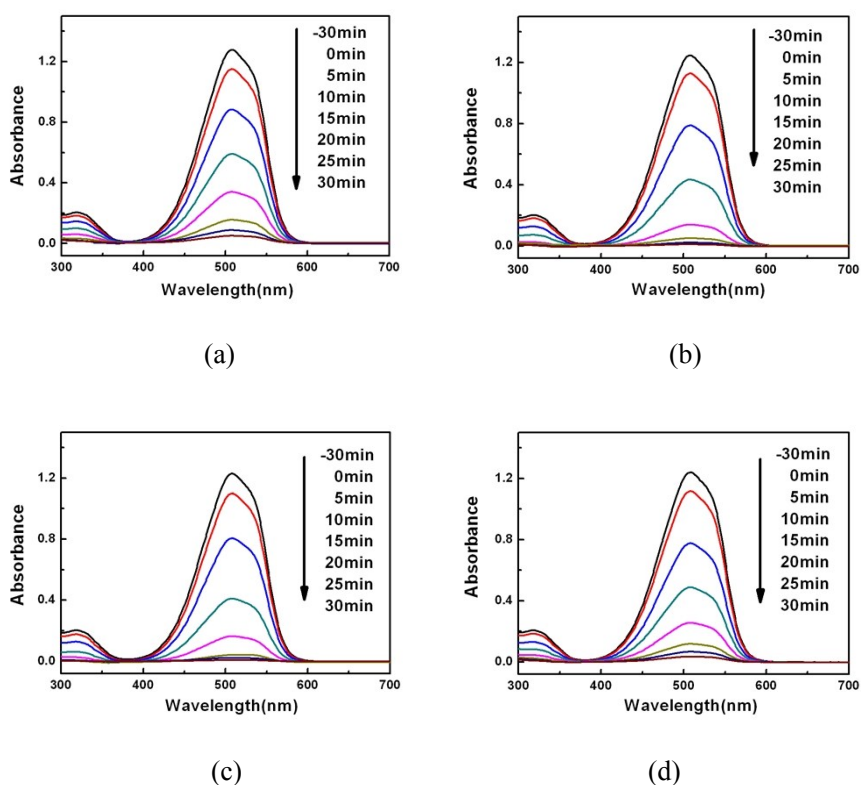

Fig. S1 UV-vis spectra of MO vs. photoreaction time catalyzed by the composite nanofibrous membrane with different mass ratio of H<sub>4</sub>SiW<sub>12</sub>O<sub>40</sub> to PA6 (a) 0.25:2.0, (b) 0.5:2.0, (c) 0.75:2.0, (d) 1.0:2.0.

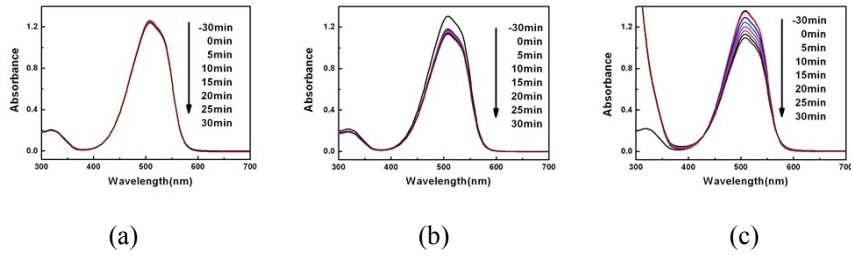

Fig. S2 Photodegradation of MO over (a) only UV irradiation, (b) PA6 nanofibrous membrane and (c)  $\text{SiW}_{12}$  against irradiation time.

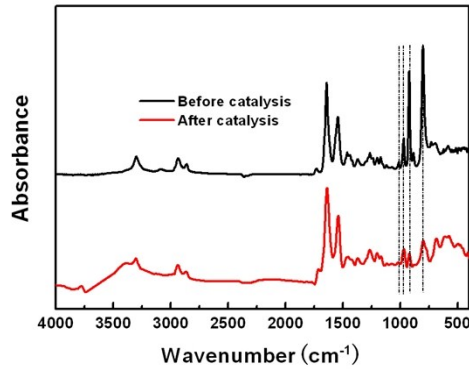

Fig. S3 FT-IR spectra of  $\text{H}_4\text{SiW}_{12}\text{O}_{40}$ /PA6 composite nanofibrous membrane before and after catalysis.

Fig. S3 shows the FT-IR spectra of  $\text{H}_4\text{SiW}_{12}\text{O}_{40}$ /PA6 composite nanofibrous membrane before and after a three-cycle photocatalytic experiment. It is obvious that the composite sample after catalysis displays four discernible peaks between  $790\text{ cm}^{-1}$  and  $1100\text{ cm}^{-1}$ , agreeing with Keggin unit well, which indicates that the Keggin structure of  $\text{H}_4\text{SiW}_{12}\text{O}_{40}$  remains intact in the membrane after the water has been flowed through the system.
